# Supplementary material for: Three-dimensional interconnected network GeOx/multi-walled CNT composite spheres as high-performance anodes for lithium ion batteries
Source: Royal Society of Chemistry journal article supplement (doi:10.1039/c5ta04456a), 2015-01-01

## Supporting Information

Three-dimensional interconnected network GeO<sub>x</sub>/multi-walled  
CNTs composite spheres as high-performance anodes for  
lithium ion batteries

Wei He<sup>a</sup>, Huajun Tian<sup>a\*</sup>, Xiaoliang Wang<sup>a†</sup>, Fengxia Xin<sup>a</sup> and Weiqiang  
Han<sup>a, b\*</sup>

<sup>a</sup>*Ningbo Institute of Materials Technology and Engineering, Chinese Academy of  
Sciences, Ningbo 315201, P. R. China*

<sup>b</sup>*School of Physical Science and Technology, Shanghai Tech University,  
Shanghai 200031, P. R. China*

<sup>†</sup>*Present address: Seo Inc., 3906 Trust Way, Hayward, CA 94545*

\*Corresponding Author:

E-mail address: [tianhuajun@nimte.ac.cn](mailto:tianhuajun@nimte.ac.cn); [hanweiqiang@nimte.ac.cn](mailto:hanweiqiang@nimte.ac.cn)

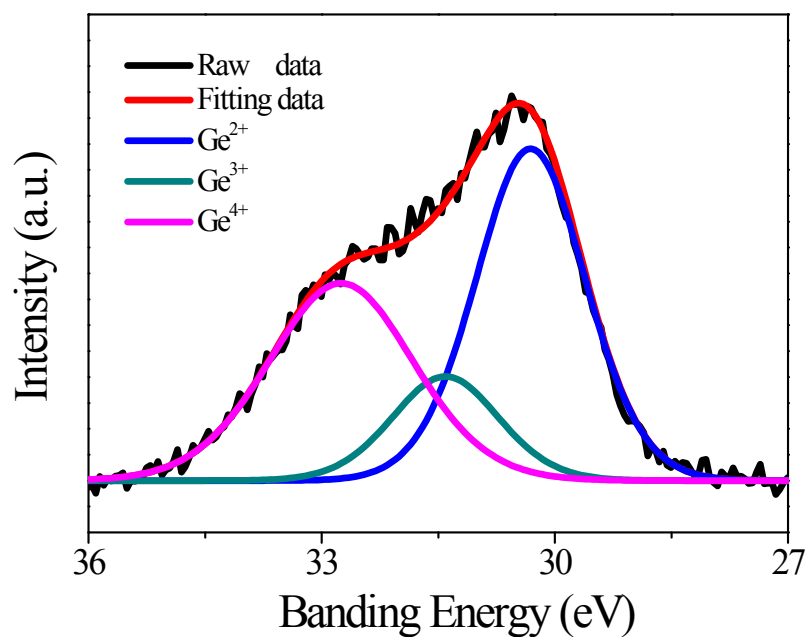

Figure S1. X-ray photoelectron spectroscopy analysis of the  $\text{GeO}_x/\text{MWCNTs}$  composite spheres

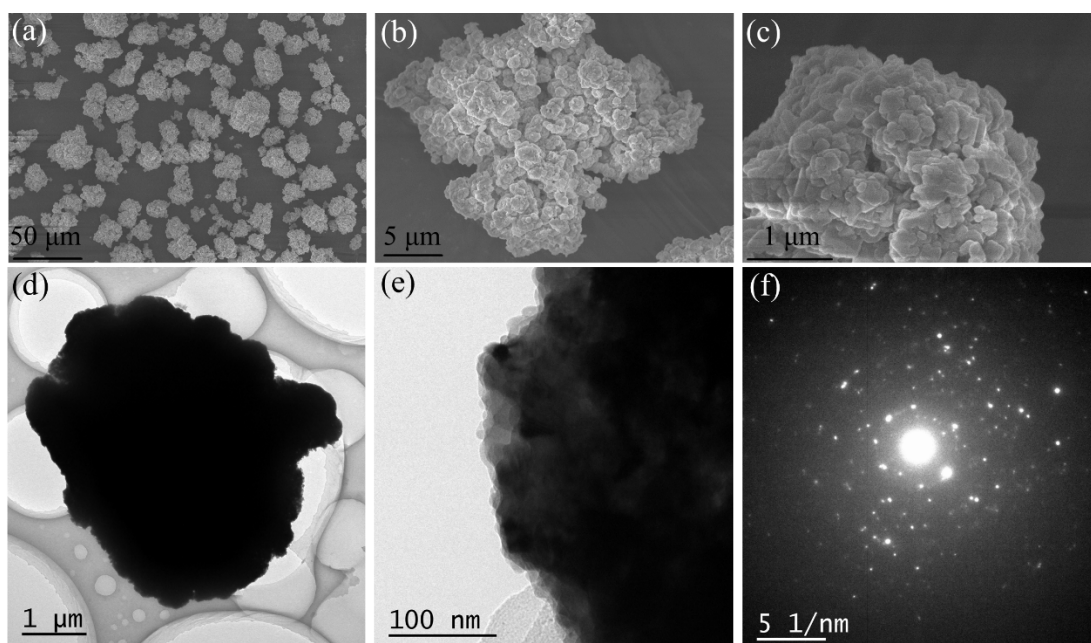

Figure S2. (a - c) SEM images of the commercial  $\text{GeO}_2$ ; (d, e) TEM images of the commercial  $\text{GeO}_2$ , and (f) is the selected area electron diffraction (SAED) of the center of the commercial  $\text{GeO}_2$ .

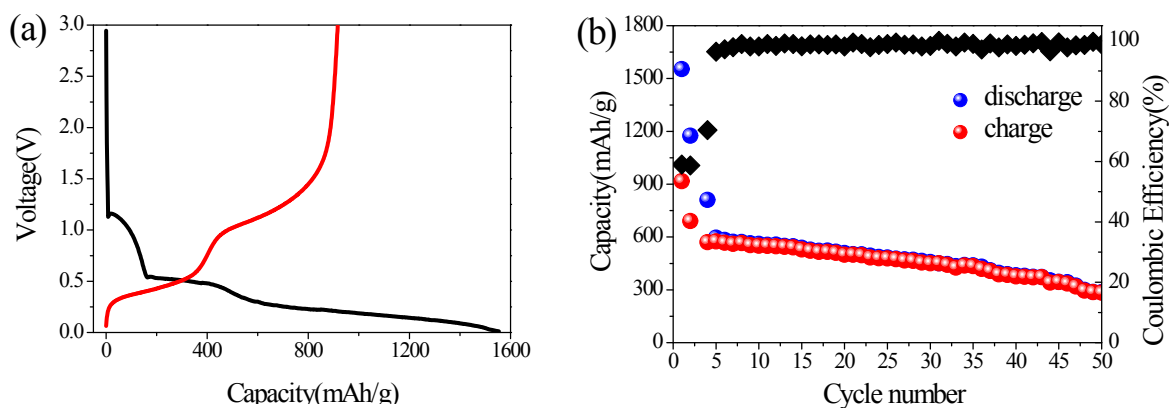

Figure S3. Electrochemical performance of the commercial  $\text{GeO}_2$ : (a) charge/discharge profiles of the commercial  $\text{GeO}_2$ . (d) Cycling performance and Coulombic efficiencies of the commercial  $\text{GeO}_2$  at a current density of 50 mA/g for the initial two cycles and at 500 mA/g in the following cycles.

3D GeOx/MWCNTs composite spheres as anode exhibited high rate capability and long-life performances with high areal loading for lithium ion batteries.

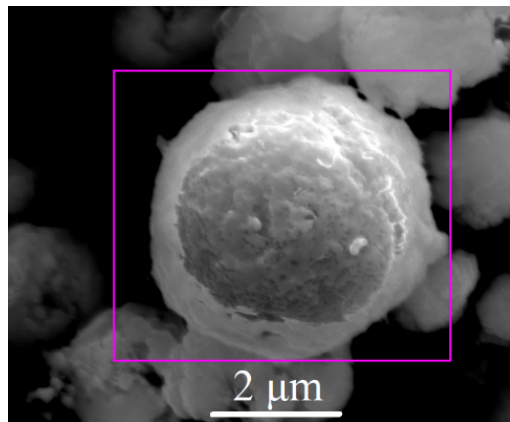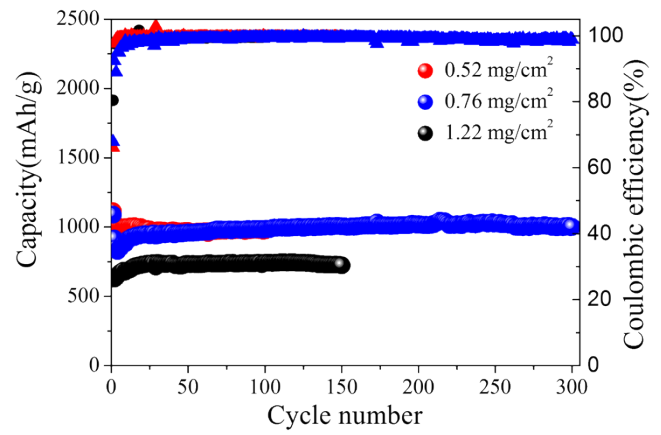

Supplement: c5ta04456a1.pdf [file c5ta04456a1.pdf]
